# Supplementary material
Source: Springer Nature journal article supplement (https://www.springermedizin.de/resource/supplementary/12885_2008_1290_MOESM5_ESM.pdf/9471662)

# MECA/Gv39M

**Control**

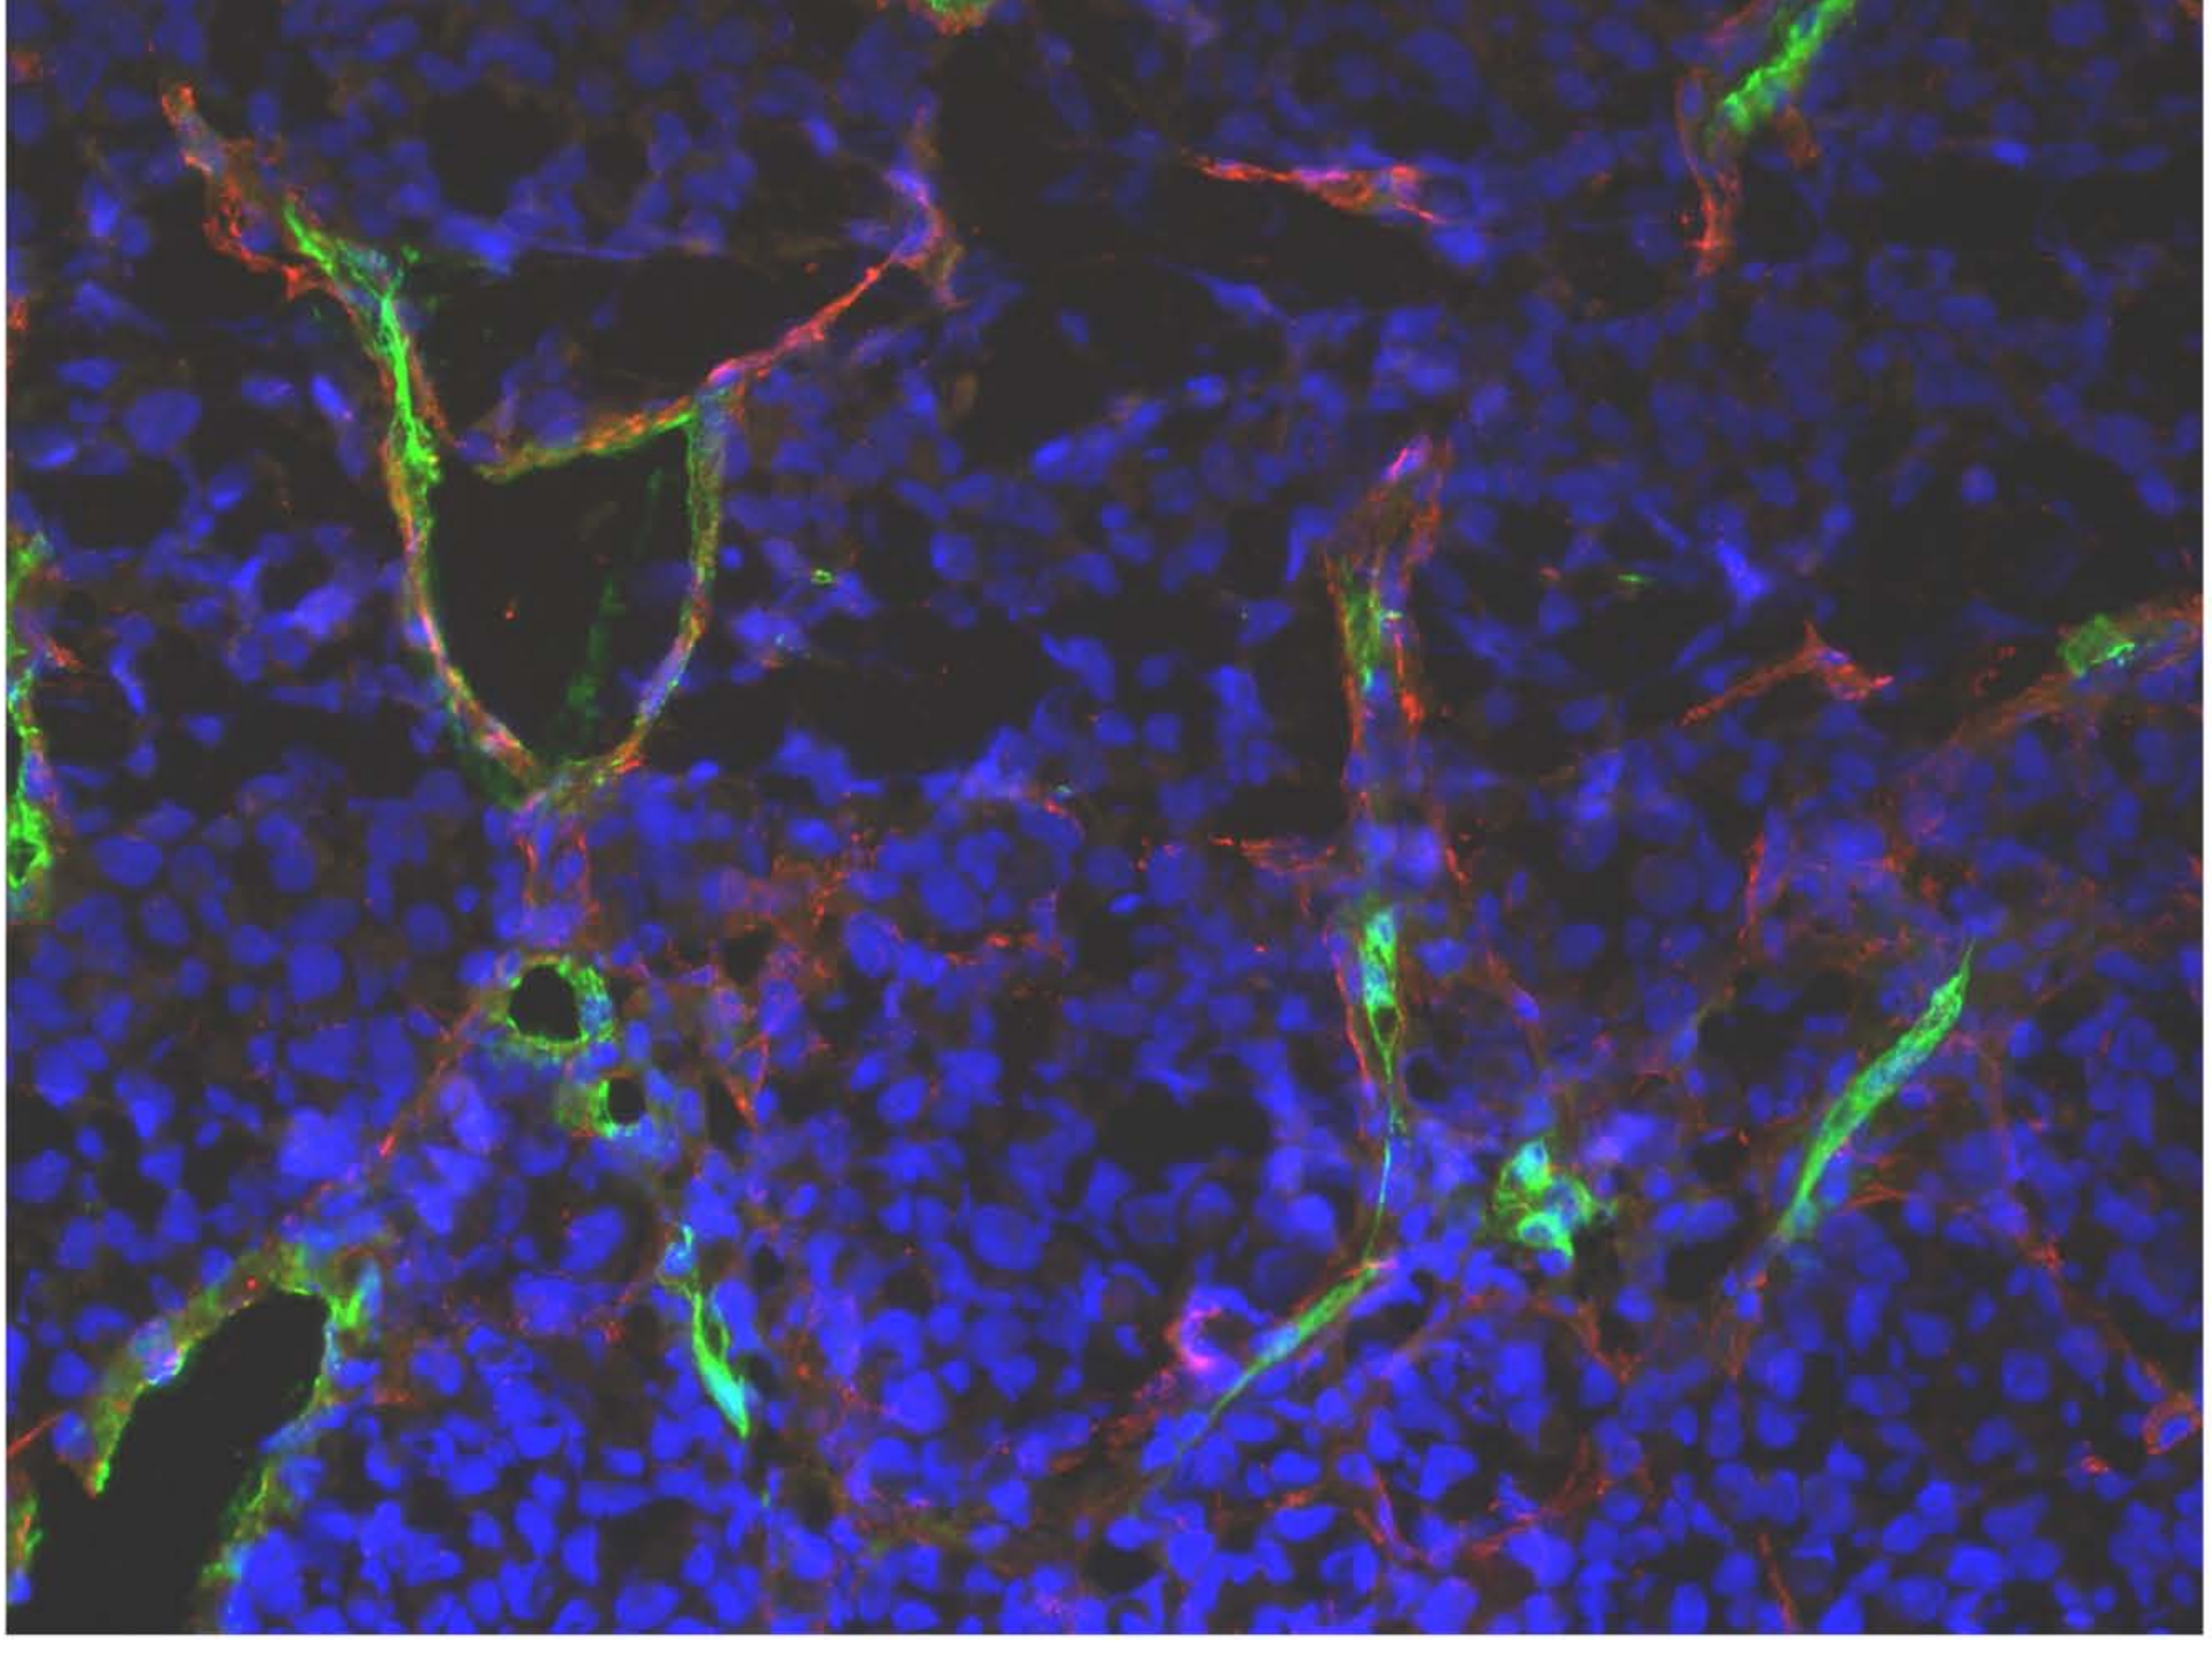

**CT-322**

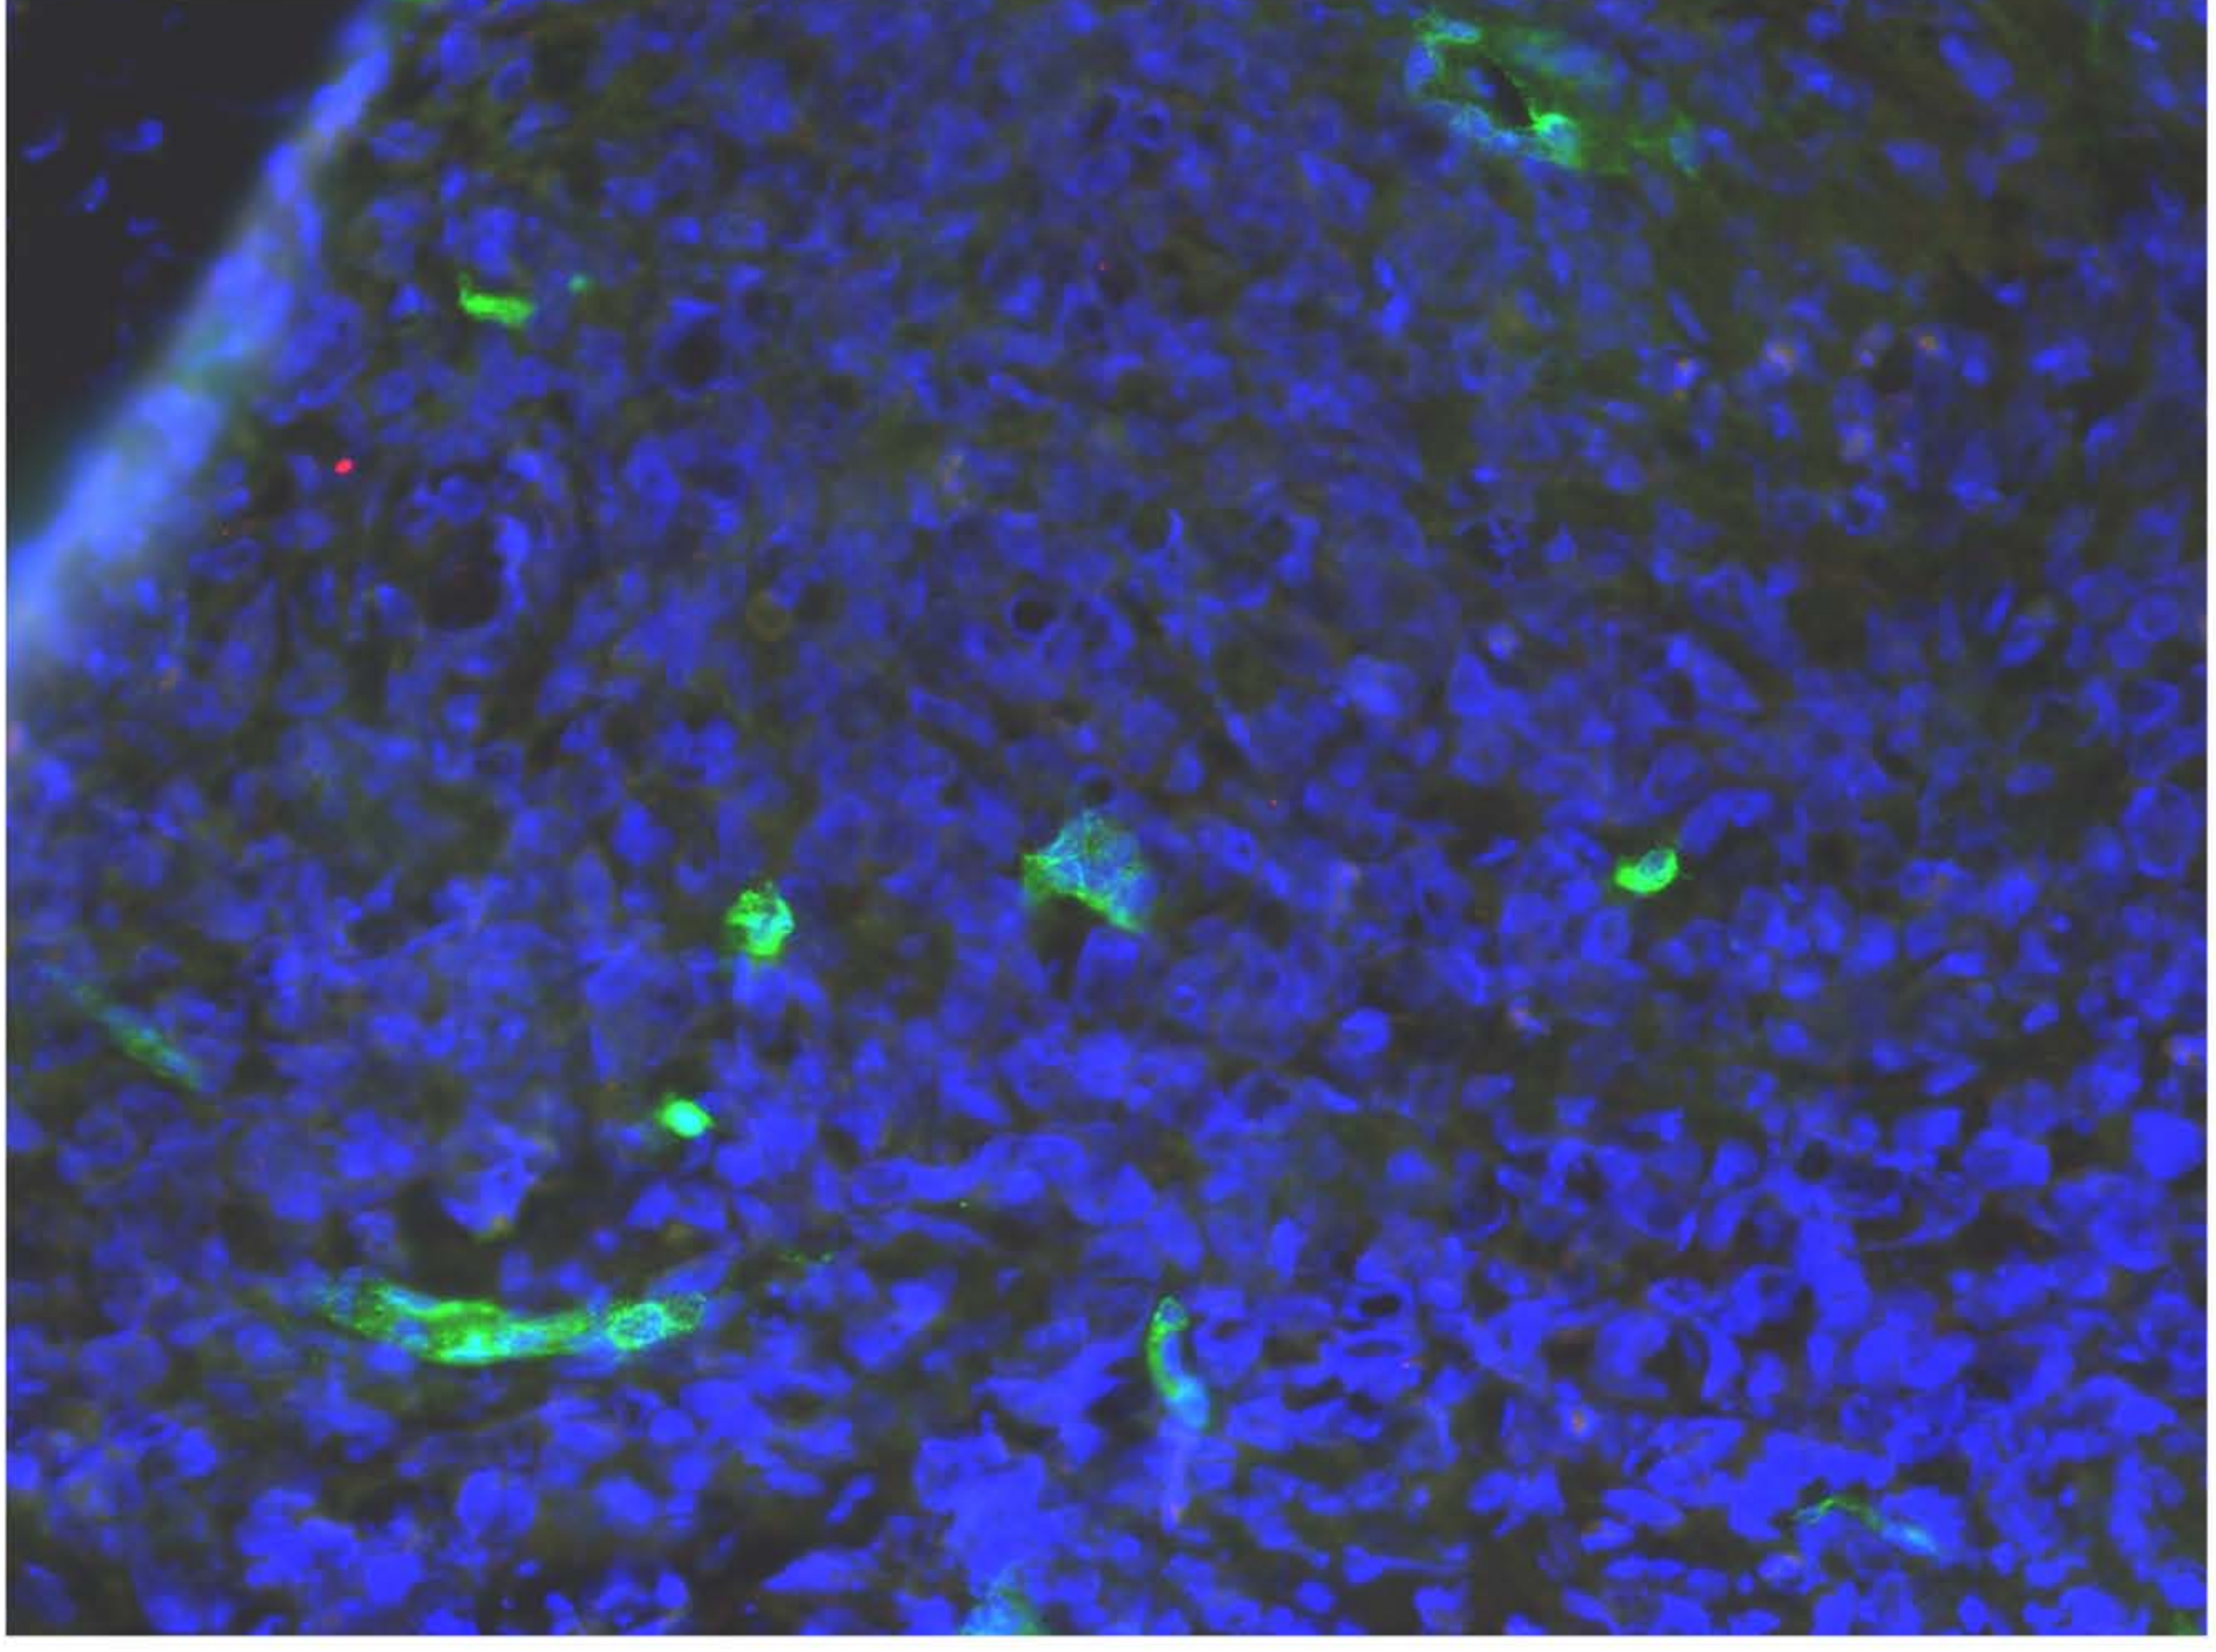

**Percent Gv39m+/MECA+  
Vessels per 20X Field**

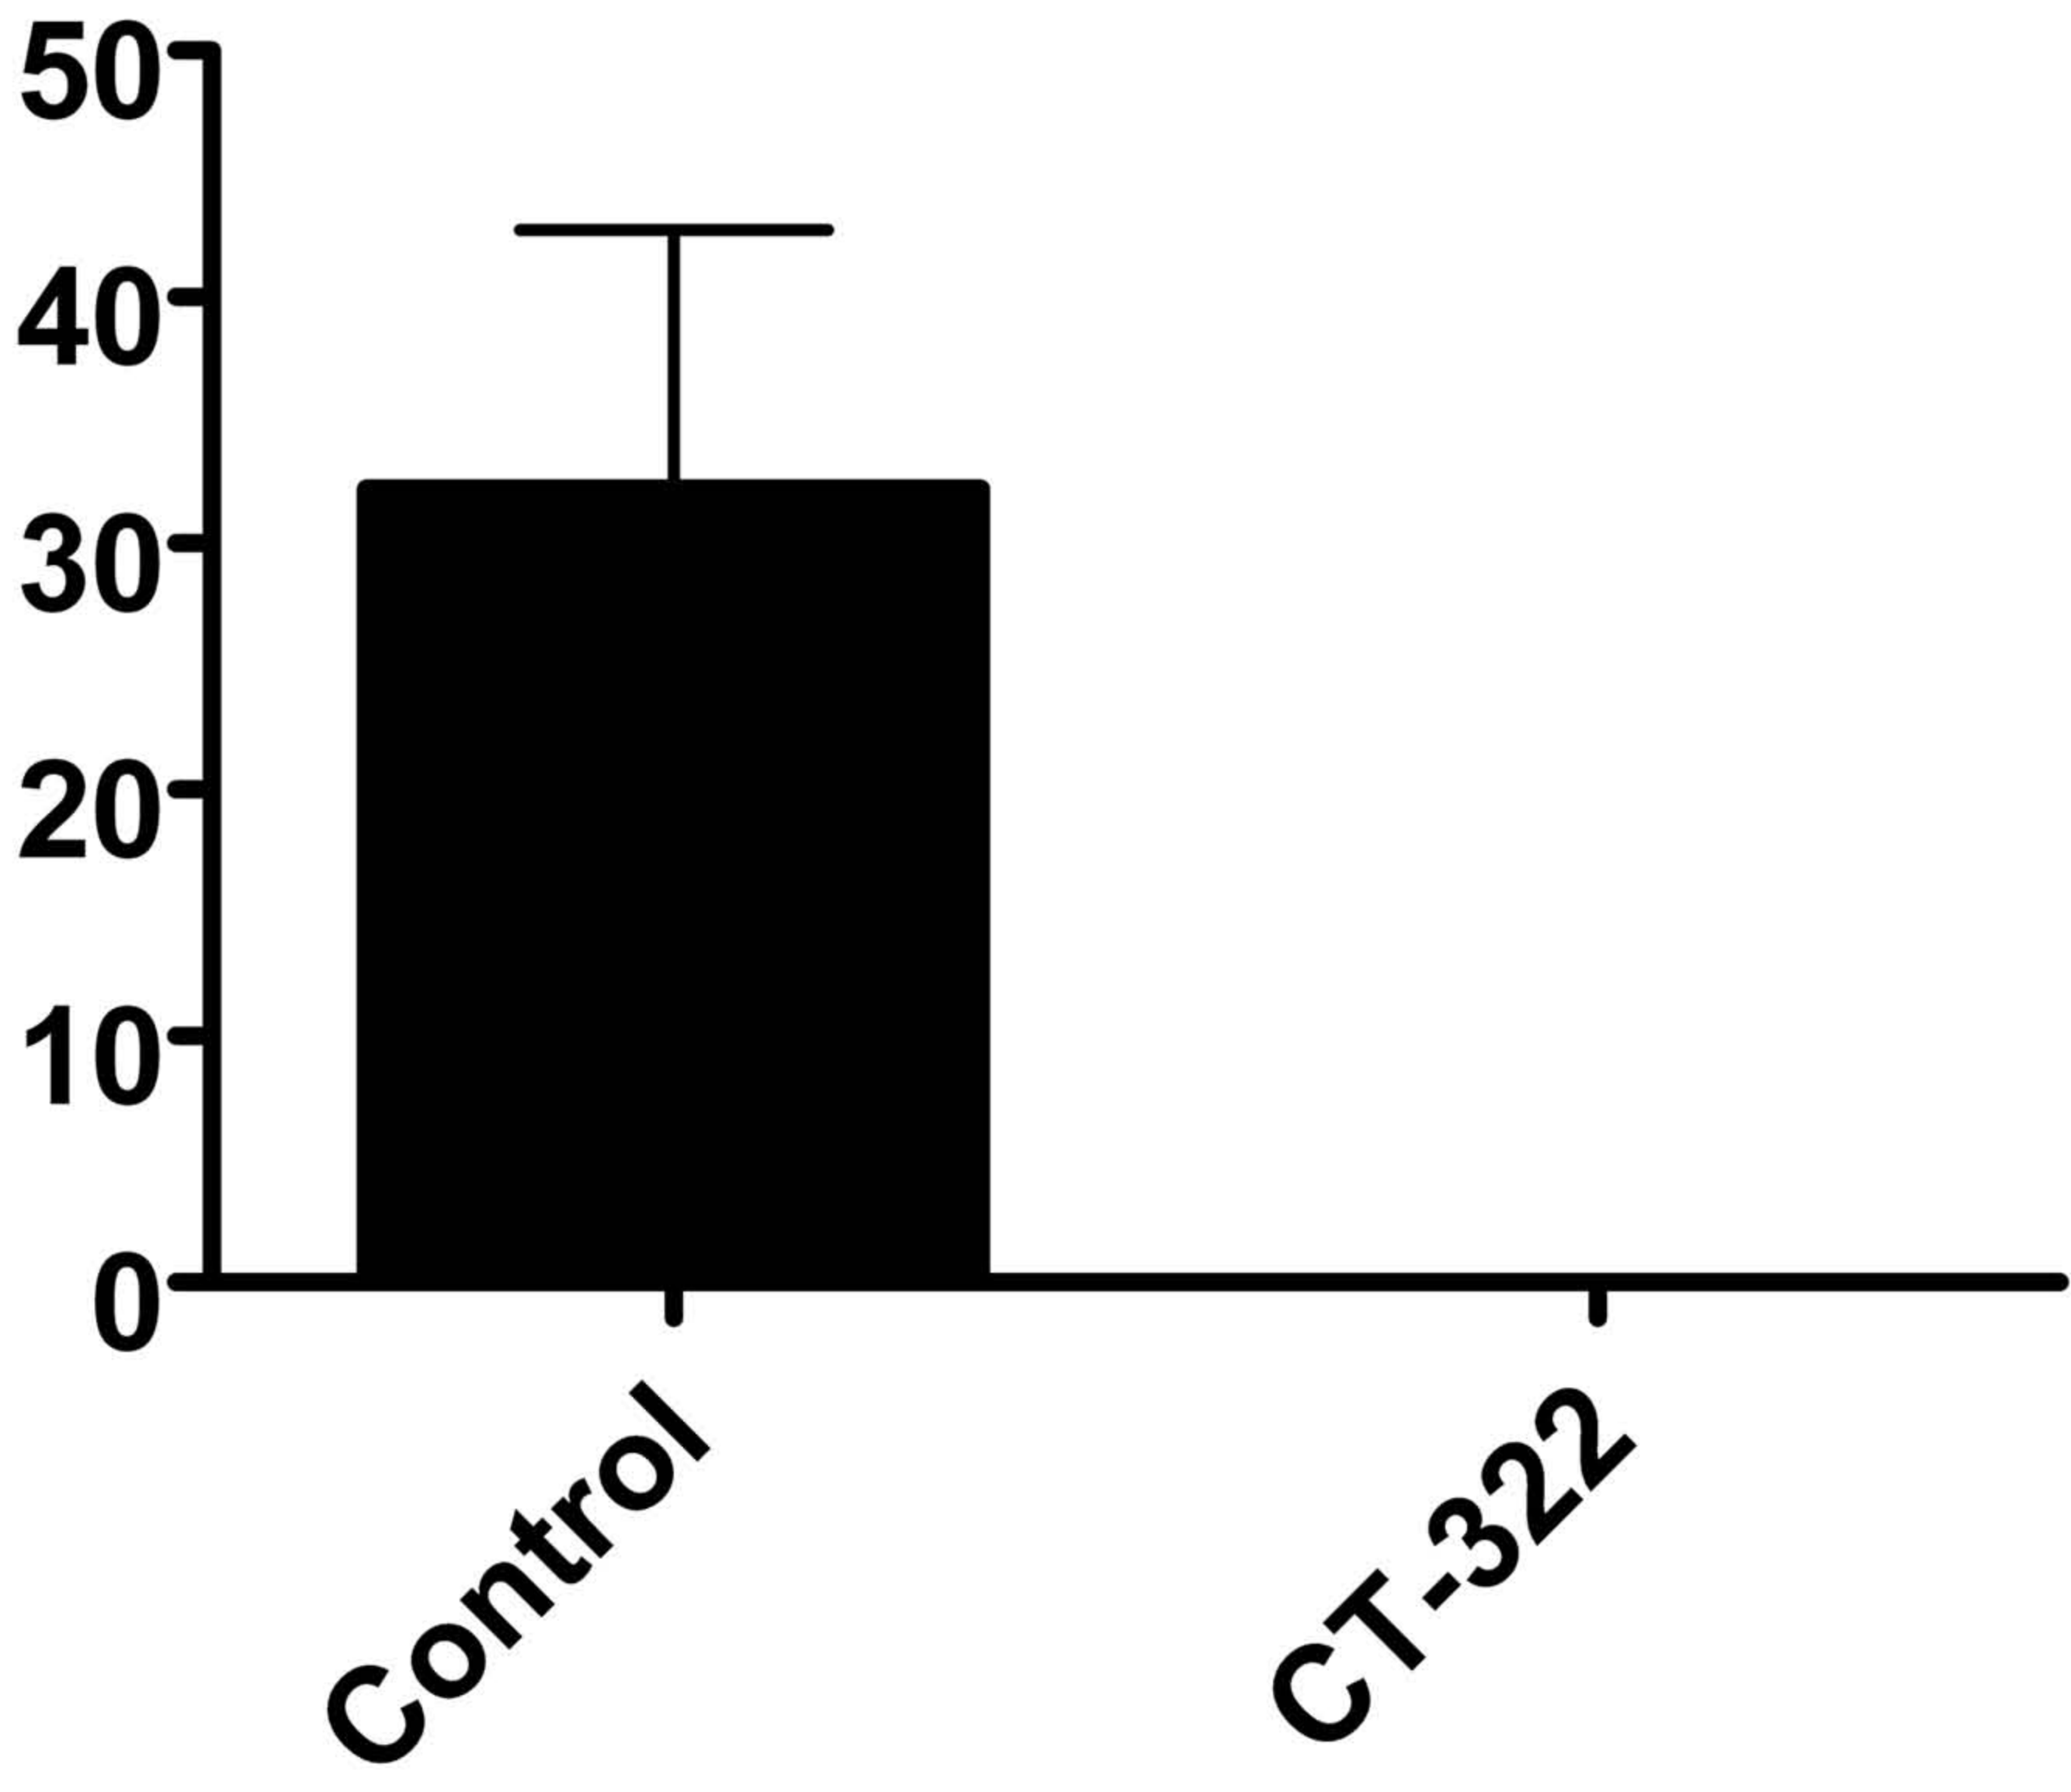

Supplement: MOESM5 [file 9471662]
